# Supplementary material
Source: publisher site journal article supplement (https://www.dovepress.com/article/566519)

A

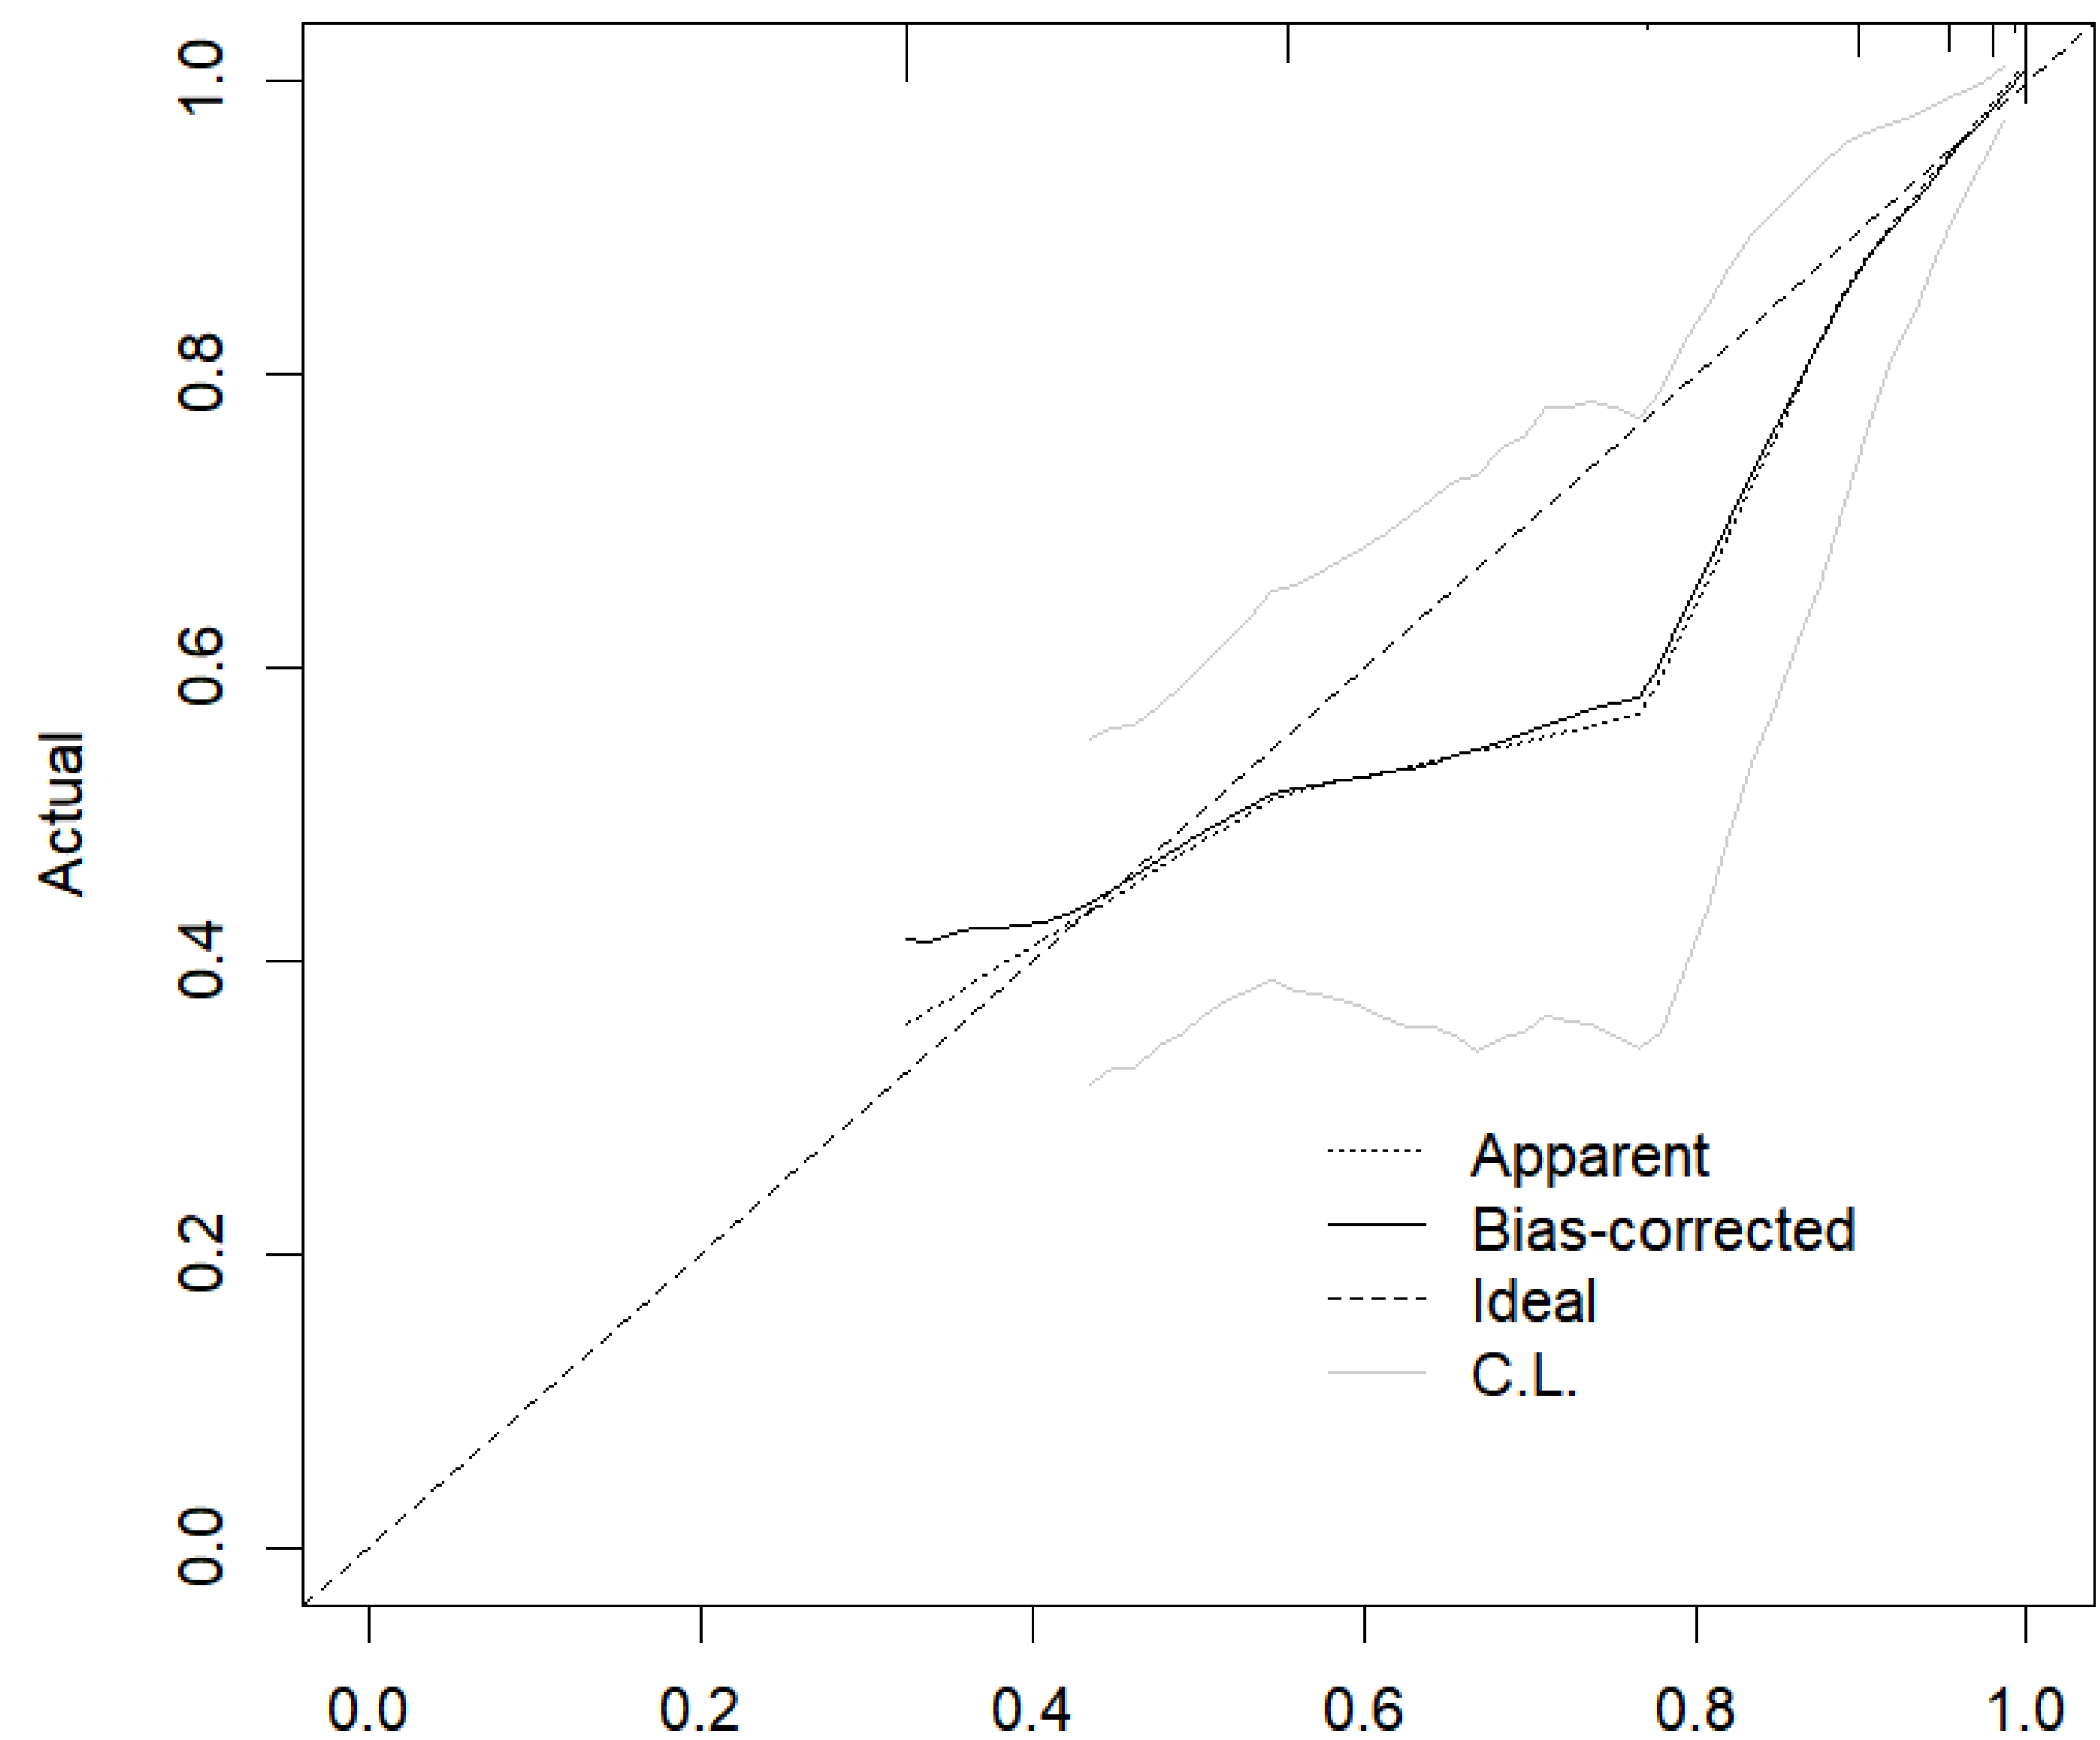

B= 40 repetitions, boot

Mean absolute error=0.034 n=242

B

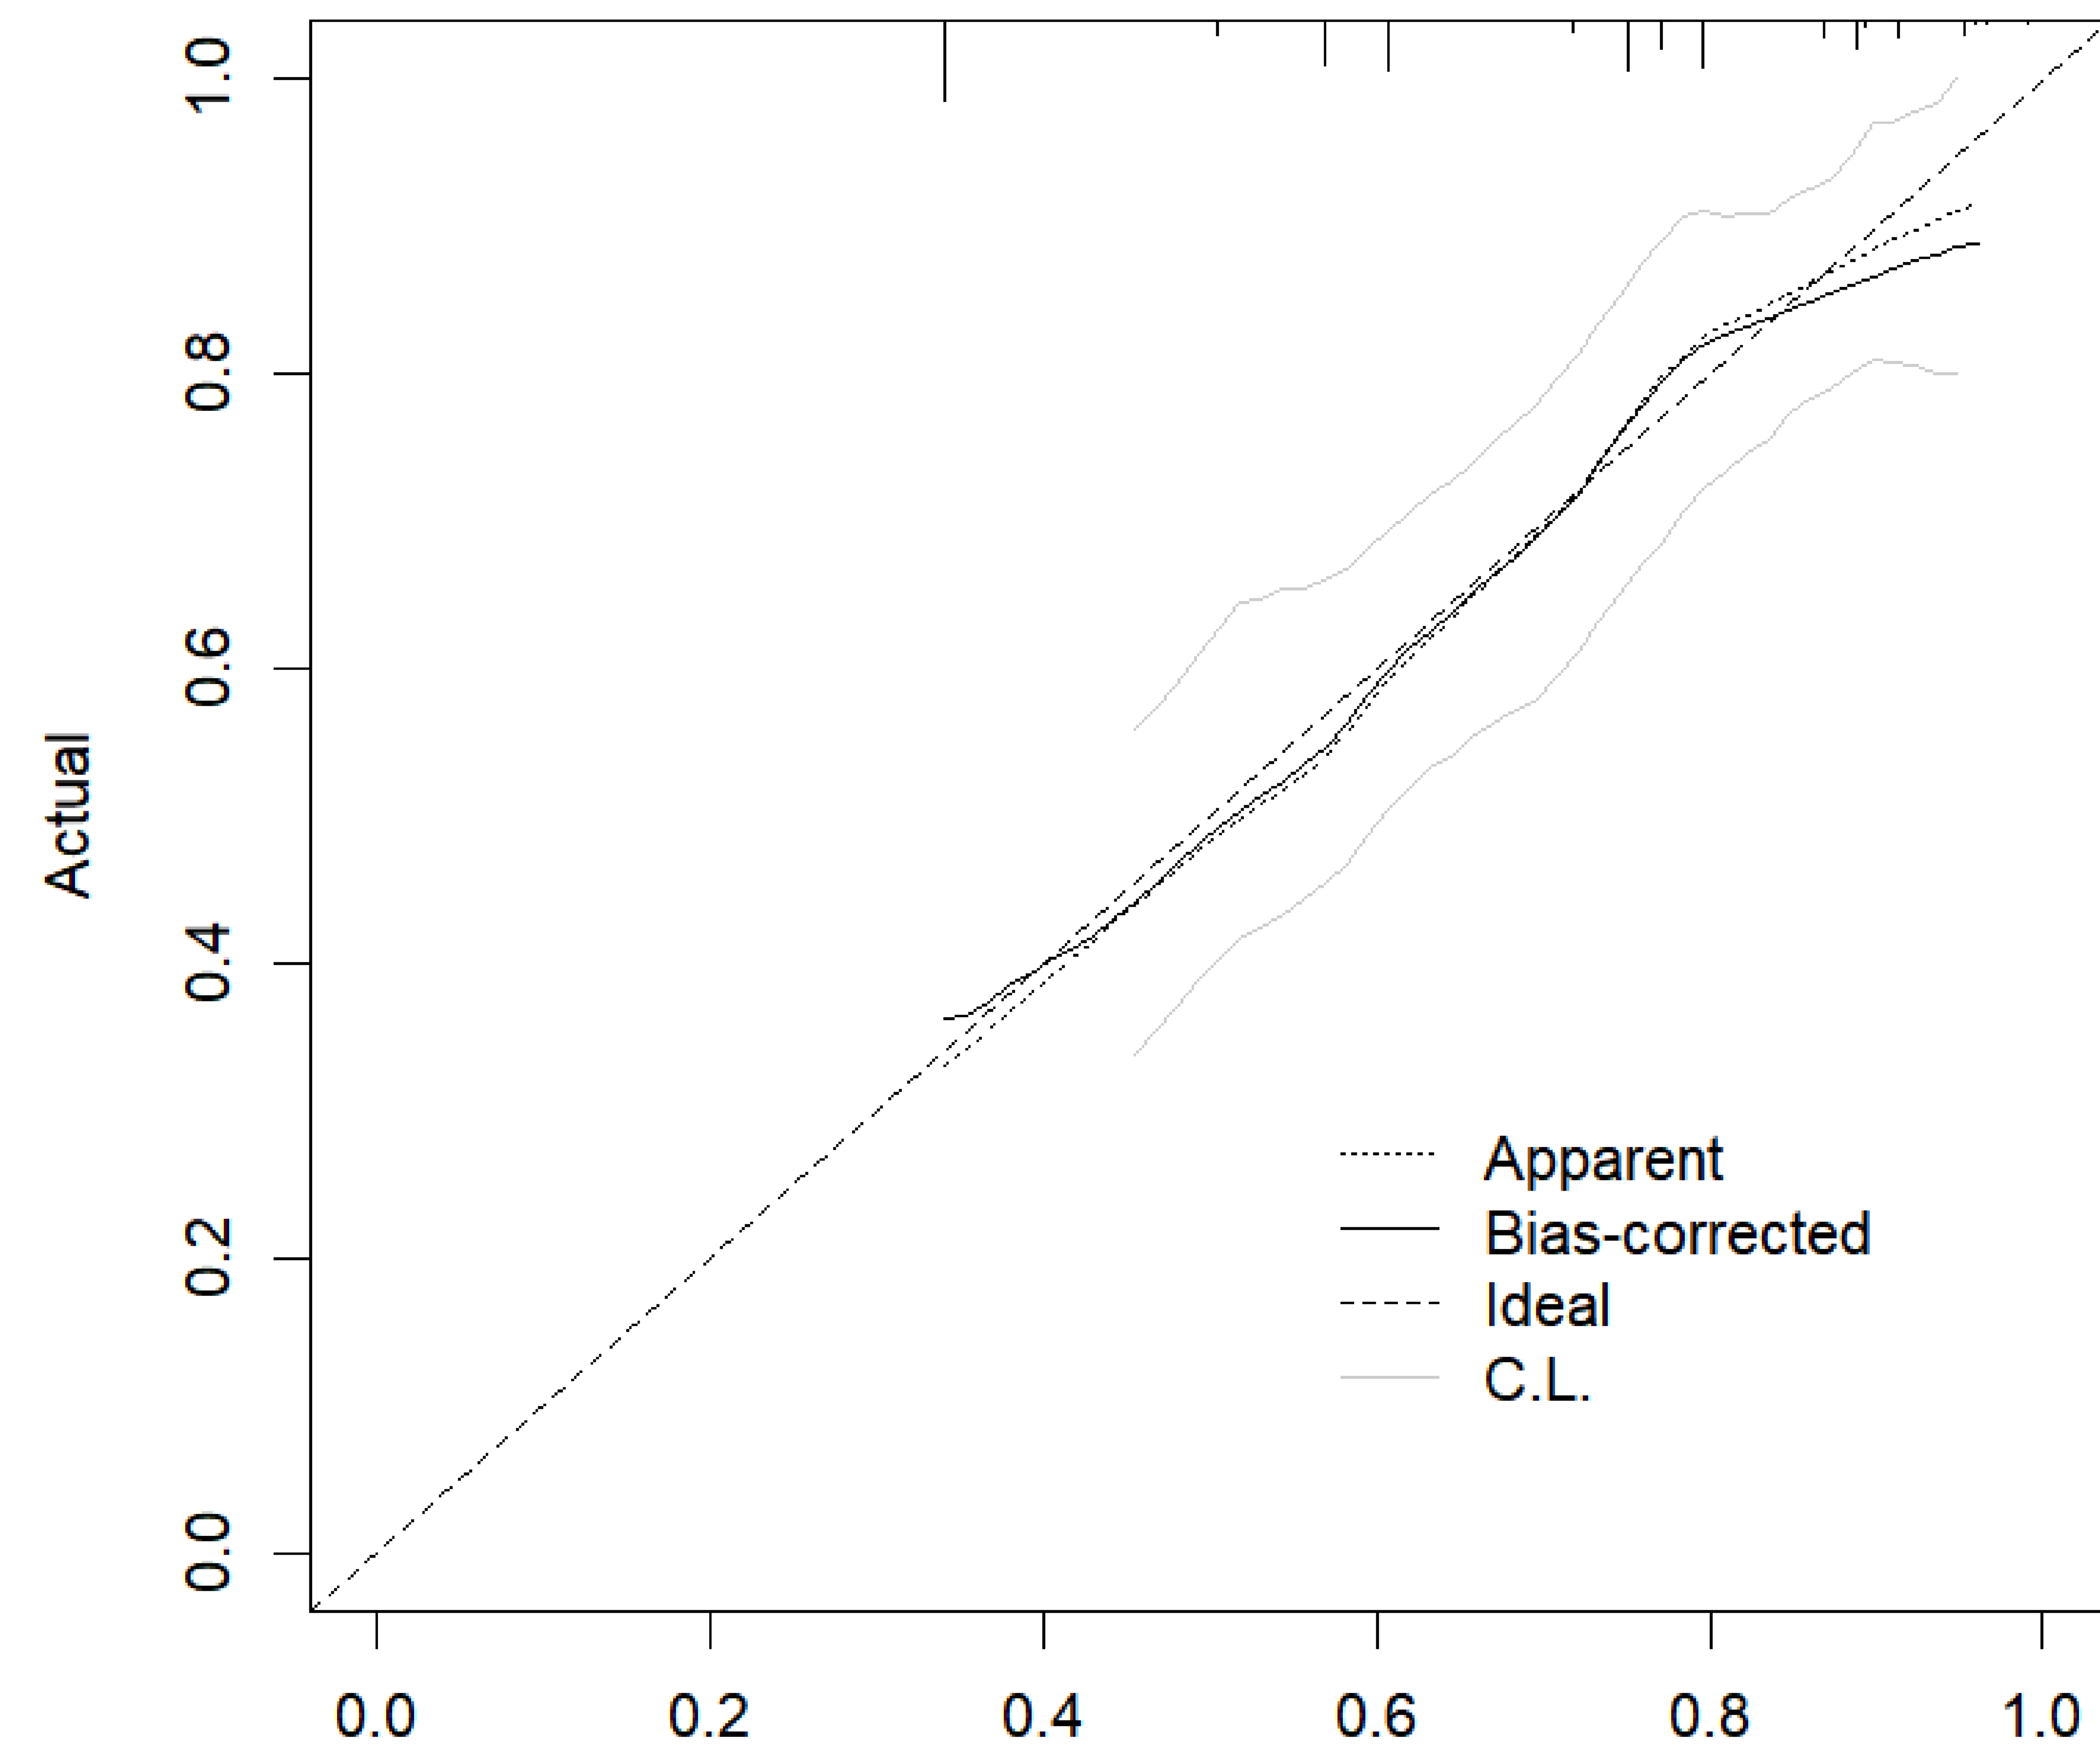

B= 40 repetitions, boot

Mean absolute error=0.022 n=280

Supplement: Supplementary file 1 [file 566519 Revised Supplementary Figure S1.pdf › 566519 Revised Supplementary Figure S1.pdf]
